# Supplementary material
Source: publisher figshare collection journal article supplement (https://sage.figshare.com/ndownloader/files/36009506)
Supplement: Supplementary file 1 [file 36009506]

| **Sex: Male** | | **Total Instances Observed** | | | **Incidence Range** | | |
| --- | --- | --- | --- | --- | --- | --- | --- |
| **Tissue** | **Observation** | **Cambodian** | **Chinese** | **Vietnamese** | **Cambodian** | **Chinese** | **Vietnamese** |
| Bone / Joint | Anomaly (Developmental) | - | 1 (0.16%), N=616 | - | - | [0-25.00%] | - |
| Degeneration/Necrosis | - | 2 (0.32%), N=616 | - | - | [0-20.00%] | - |
| Fracture | - | 1 (0.16%), N=616 | - | - | [0-20.00%] | - |
| Hemorrhage | - | 2 (0.32%), N=616 | - | - | [0-40.00%] | - |
| Hypertrophy/Hyperplasia | 1 (0.44%), N=228 | 2 (0.32%), N=616 | - | [0-25.00%] | [0-16.67%] | - |
| Inflammation | - | 1 (0.16%), N=616 | - | - | [0-33.33%] | - |
| Skeletal Muscle | Degeneration/Necrosis | 3 (1.32%), N=227 | 7 (1.16%), N=606 | 1 (1.01%), N=99 | [0-16.67%] | [0-33.33%] | [0-16.67%] |
| Fibrosis | - | 1 (0.17%), N=606 | - | - | [0-16.67%] | - |
| Hemorrhage | 1 (0.44%), N=227 | - | 1 (1.01%), N=99 | [0-20.00%] | - | [0-20.00%] |
| Infiltrate, (Mononuclear Cell) | 10 (4.41%), N=227 | 18 (2.97%), N=606 | 3 (3.03%), N=99 | [0-44.44%] | [0-40.00%] | [0-20.00%] |
| Inflammation | 1 (0.44%), N=227 | 3 (0.5%), N=606 | - | [0-20.00%] | [0-25.00%] | - |
| Parasite | - | 2 (0.33%), N=606 | - | - | [0-16.67%] | - |
| Regeneration | - | 5 (0.83%), N=606 | 2 (2.02%), N=99 | - | [0-22.22%] | [0-20.00%] |

| **Sex: Female** | | **Total Instances Observed** | | | **Incidence Range** | | |
| --- | --- | --- | --- | --- | --- | --- | --- |
| **Tissue** | **Observation** | **Cambodian** | **Chinese** | **Vietnamese** | **Cambodian** | **Chinese** | **Vietnamese** |
| Bone / Joint | Degeneration/Necrosis (Cartilage) | - | 1 (0.16%), N=613 | - | - | [0-33.33%] | - |
| Degeneration/Necrosis | - | 3 (0.49%), N=613 | - | - | [0-50.00%] | - |
| Fracture | 1 (0.46%), N=219 | 1 (0.16%), N=613 | - | [0-16.67%] | [0-25.00%] | - |
| Hemorrhage | - | - | 1 (0.98%), N=102 | - | - | [0-25.00%] |
| Hypertrophy/Hyperplasia | - | 1 (0.16%), N=613 | 1 (0.98%), N=102 | - | [0-16.67%] | [0-20.00%] |
| Infiltrate, (Mononuclear Cell) | - | 1 (0.16%), N=613 | - | - | [0-25.00%] | - |
| Inflammation | - | 2 (0.33%), N=613 | - | - | [0-25.00%] | - |
| Skeletal Muscle | Atrophy | - | 1 (0.17%), N=601 | - | - | [0-16.67%] | - |
| Degeneration/Necrosis | 2 (0.92%), N=218 | 7 (1.16%), N=601 | 2 (2%), N=100 | [0-33.33%] | [0-66.67%] | [0-20.00%] |
| Fibrosis | - | 2 (0.33%), N=601 | - | - | [0-33.33%] | - |
| Hemorrhage | 1 (0.46%), N=218 | 1 (0.17%), N=601 | - | [0-25.00%] | [0-20.00%] | - |
| Histiocytosis | - | 1 (0.17%), N=601 | - | - | [0-20.00%] | - |
| Infiltrate, (Mast Cell) | - | 1 (0.17%), N=601 | - | - | [0-16.67%] | - |
| Infiltrate, (Mononuclear Cell) | 3 (1.38%), N=218 | 16 (2.66%), N=601 | 1 (1%), N=100 | [0-33.33%] | [0-66.67%] | [0-20.00%] |
| Inflammation | 2 (0.92%), N=218 | 4 (0.67%), N=601 | 2 (2%), N=100 | [0-25.00%] | [0-33.33%] | [0-20.00%] |
| Parasite | - | - | 1 (1%), N=100 | - | - | [0-20.00%] |
| Regeneration | - | 2 (0.33%), N=601 | 1 (1%), N=100 | - | [0-33.33%] | [0-20.00%] |
| Thrombus | - | 1 (0.17%), N=601 | - | - | [0-25.00%] | - |
